# Supplementary material for: Density-functional theory calculations, luminescence properties and fluorescence ratiometric thermo-sensitivity for a novel borate based red phosphor: NaBaSc(BO3)2:Ce3+,Mn2+
Source: Royal Society of Chemistry journal article supplement (doi:10.1039/c8tc06034g), 2019-01-01
Supplement: c8tc06034g1.pdf [file c8tc06034g1.pdf]

**Density-functional theory calculations, luminescence properties and fluorescence ratiometric thermo-sensitive for a novel borate based red phosphor:  $\text{NaBaSc}(\text{BO}_3)_2\text{:Ce}^{3+},\text{Mn}^{2+}$**

Wanying Geng, Xufeng Zhou, Jianyan Ding, Yuhua Wang\*

<sup>a</sup>National and Local Joint Engineering Laboratory for Optical Conversion Materials and Technology of the National Development and Reform Commission, Lanzhou University, Lanzhou, 730000, China

<sup>b</sup>Key Laboratory for Special Function Materials and Structural Design of the Ministry of the Education, Lanzhou University, Lanzhou, 730000, China

<sup>c</sup>School of Physical Science and Technology, Lanzhou University, Lanzhou, 730000, China

E-mail: [wyh@lzu.edu.cn](mailto:wyh@lzu.edu.cn); Fax: +86-931-8913554; Tel: +86-931-8912772.

## The formation energies as a function of $E_f$ for point defects in NBS

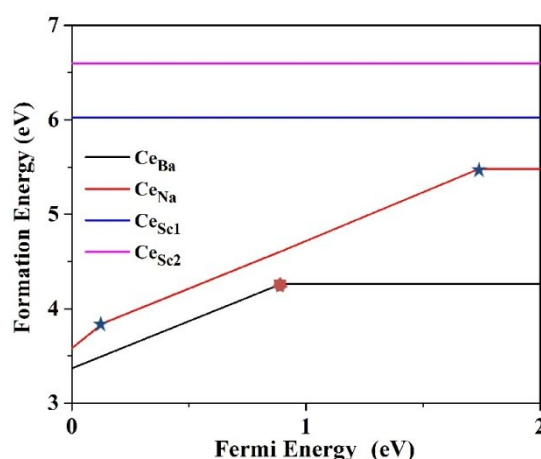

**Figure S1.** Formation energies as a function of  $E_f$  for point defects in NBS.

The formation energies as a function of  $E_f$  for each point defect in NBS are shown in Figure S1. The highlight points in the curves for  $\text{Ce}_{\text{Ba}}$  and  $\text{Ce}_{\text{Na}}$  demonstrate the transitions between different charge states. As shown in the Figure S1, the  $\text{Ce}_{\text{Ba}}$  and  $\text{Ce}_{\text{Na}}$  always have lower formation energy in NBS. When fermi energy is higher than 0.892 or 1.736 eV, the neutral  $\text{Ce}_{\text{Ba}}$  and  $\text{Ce}_{\text{Na}}$  shows lower formation, while  $\text{Ce}_{\text{Na}}^{2+}$  becomes more stable when the Fermi level is below 0.133 eV. Because the band gap value of NBS is 5.90 eV, the Fermi energy at 0.133, 0.892 or 1.736 all close to VBM than to CBM. Thus, the +2, +1 charged  $\text{Ce}_{\text{Na}}$  and +1 charged  $\text{Ce}_{\text{Ba}}$  are stable at the hole doping compound, while the neutral  $\text{Ce}_{\text{Na}}$  and  $\text{Ce}_{\text{Ba}}$  are stable in the electron doping cases.<sup>1-2</sup>

## References

1. H. Chen, C. Y. Wang, J. T. Wang, X. P. Hu and S. X. Zhou, *J. Appl. Phys.*, 2012, **112**, 084513.
2. B. Qu, B. Zhang, L. Wang, R. Zhou and X. C. Zeng, *Chem. Mater.*, 2015, **27**, 2195

## Morphology of NBS:0.02Ce<sup>3+</sup>,0.03Mn<sup>2+</sup>

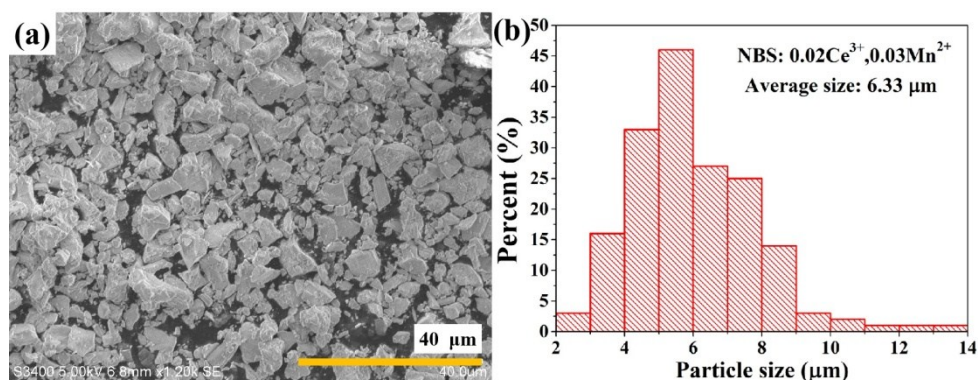

**Figure S2.** (a) SEM micrograph and (b) the particle size distribution of NBS:0.02Ce<sup>3+</sup>,0.03Mn<sup>2+</sup>.

The irregular morphology of NBS:0.02Ce<sup>3+</sup>,0.03Mn<sup>2+</sup> has been observed by the SEM micrograph (as shown in Figure S2(a)) and the sample shows good dispersion. The particle size distribution of the NBS:0.02Ce<sup>3+</sup>,0.03Mn<sup>2+</sup> has also been investigated by using the Nano Measurer program (as shown in Figure 1(b)). The results indicate that the particle size of the sample ranges from 2 μm to 14 μm and the average diameter is 6.33 μm.
